# Supplementary material
Source: PubMed Central journal article supplement (PMC6503526)
Supplement: NIHMS970715-supplement-supplemental.pdf [file NIHMS970715-supplement-supplemental.pdf]

**Appendix Exhibit A. Logistic regression model predicting provider agreement to "Genetic testing will motivate my patients to adopt healthy behaviors"**

|                                    |     |
|------------------------------------|-----|
| <b>Number of Observations Read</b> | 488 |
| <b>Number of Observations Used</b> | 442 |

46 observations were deleted due to missing values for the dependent or independent variables

| <b>Dependent Variable Profile</b>                                           |                  |
|-----------------------------------------------------------------------------|------------------|
| <b>Genetic testing will motivate my patients to adopt healthy behaviors</b> | <b>Frequency</b> |
| Agree                                                                       | 154              |
| Don't agree                                                                 | 288              |

| <b>Independent Variables</b>                      | <b>Odds Ratio Estimates</b> |                                   |       |
|---------------------------------------------------|-----------------------------|-----------------------------------|-------|
|                                                   | <b>Point Estimate</b>       | <b>95% Wald Confidence Limits</b> |       |
| <b>Ordered genetic test in the past 12 months</b> | 0.88                        | 0.565                             | 1.368 |
| <b>Black / Hispanic</b>                           | 2.313                       | 1.28                              | 4.18  |
| <b>Asian</b>                                      | 2.04                        | 1.305                             | 3.19  |
| <b>Academic</b>                                   | 1.604                       | 1.014                             | 2.537 |

**Wald test Chi-Square = 16.05, df = 4, p = 0.003; c-statistics = 0.62**

**Appendix Exhibit B. Logistic regression model predicting provider agreement to "Discussing genetic risk for the development of CKD will delay or prevent CKD in patients"**

|                                    |     |
|------------------------------------|-----|
| <b>Number of Observations Read</b> | 488 |
| <b>Number of Observations Used</b> | 434 |

54 observations were deleted due to missing values for the response or explanatory variables

| <b>Dependent Variable Profile</b>                                                               |                  |
|-------------------------------------------------------------------------------------------------|------------------|
| <b>Discussing genetic risk for the development of CKD will delay or prevent CKD in patients</b> | <b>Frequency</b> |
| Agree                                                                                           | 201              |
| Don't agree                                                                                     | 233              |

| <b>Odds Ratio Estimates</b>                       |                       |                                   |       |
|---------------------------------------------------|-----------------------|-----------------------------------|-------|
| <b>Independent Variables</b>                      | <b>Point Estimate</b> | <b>95% Wald Confidence Limits</b> |       |
| <b>Ordered genetic test in the past 12 months</b> | 1.129                 | 0.736                             | 1.731 |
| <b>Black / Hispanic</b>                           | 3.488                 | 1.905                             | 6.384 |
| <b>Asian</b>                                      | 1.783                 | 1.151                             | 2.762 |
| <b>Academic</b>                                   | 1.197                 | 0.775                             | 1.849 |

**Wald test Chi-Square = 19.61, df = 4, p = 0.0006; c-statistic = 0.62**
